# Supplementary material for: Characterization of the Propagation of Meteorological Drought Using the Copula Model
Source: MDPI journal article supplement (doi:10.3390/w14203293), 2022-10-18
Supplement: s1 [file s1]

## **Supplementary Materials**

### **Characterization of the propagation of meteorological drought using the copula model**

Haeun Jung<sup>a</sup>, Jeongeun Won<sup>a</sup>, Shinuk Kang<sup>b</sup>, Sangdan Kim<sup>a,\*</sup>

<sup>a</sup>Division of Earth Environmental System Science (Major of Environmental Engineering), Pukyong National University, Busan 48513, Korea

<sup>b</sup>K-water Research Institute, K-water, Daejeon 34045, Korea

\*Corresponding author at: Division of Earth Environmental System Science (Major of Environmental Engineering), Pukyong National University, Busan 48513, Korea; skim@pknu.ac.kr

17 pages, 4 figures, 10 table

**Figures**

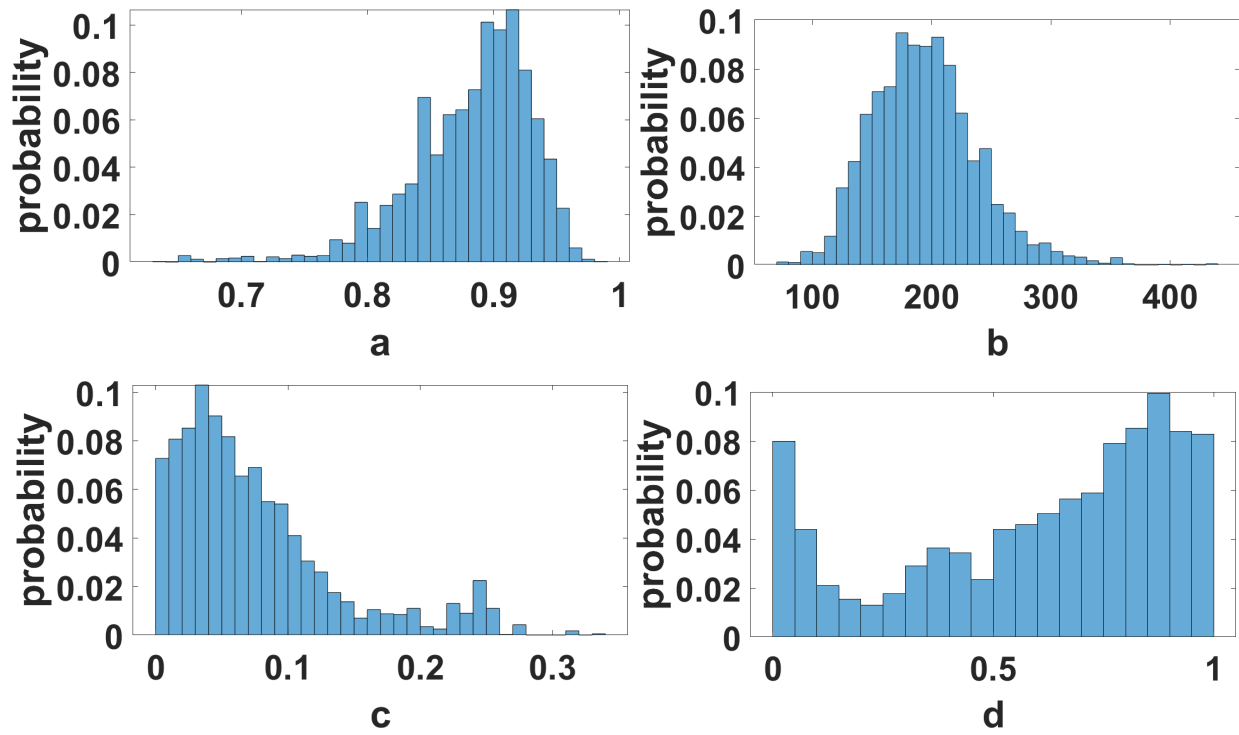

**Figure S1.** Posterior distribution of abcd model parameters (Andong Dam Basin).

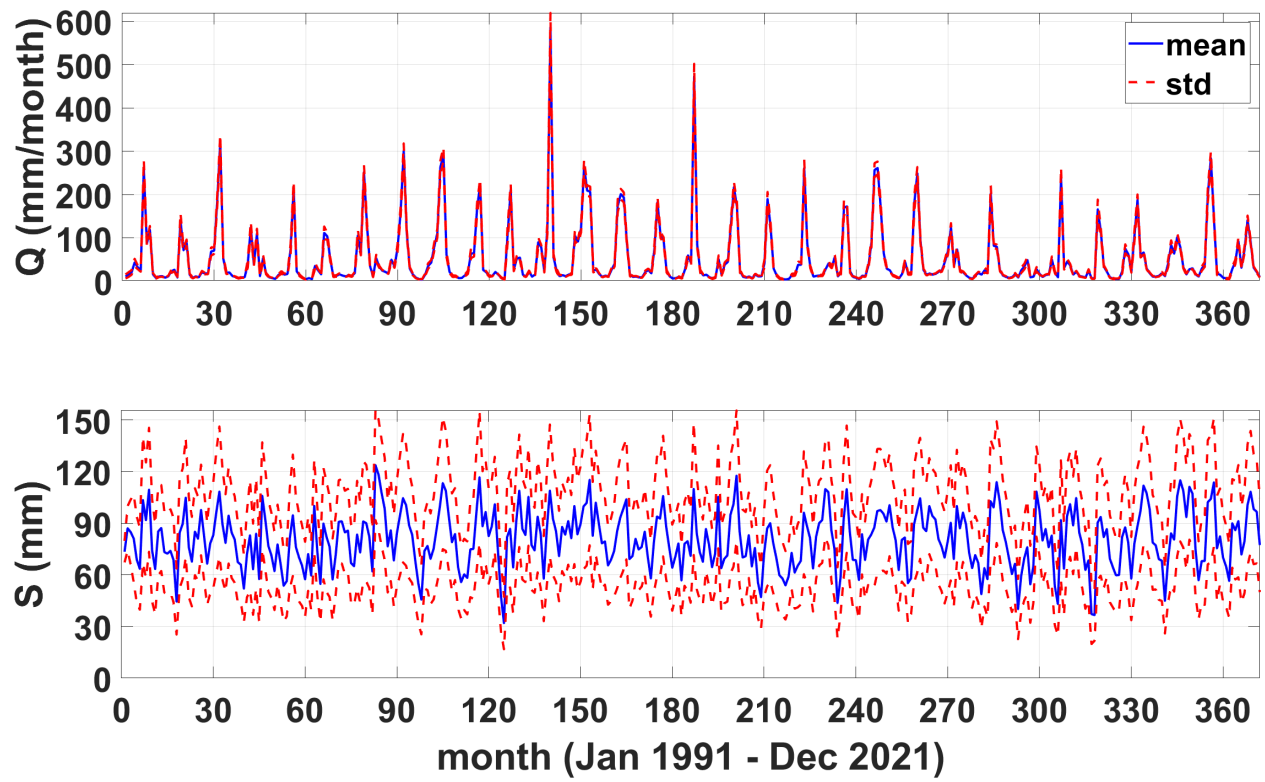

**Figure S2.** Simulated monthly runoff ensembles from posterior distribution of parameters (Andong Dam Basin).

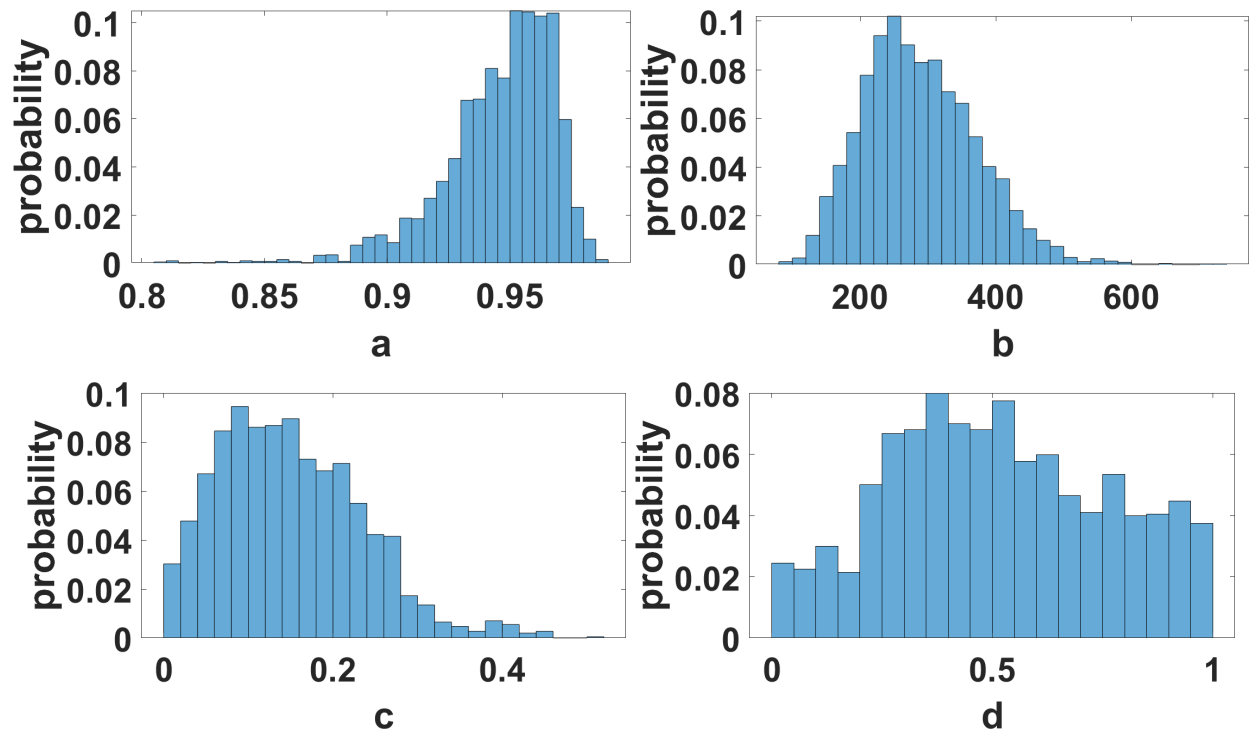

**Figure S3.** Posterior distribution of abcd model parameters (Hapcheon Dam Basin).

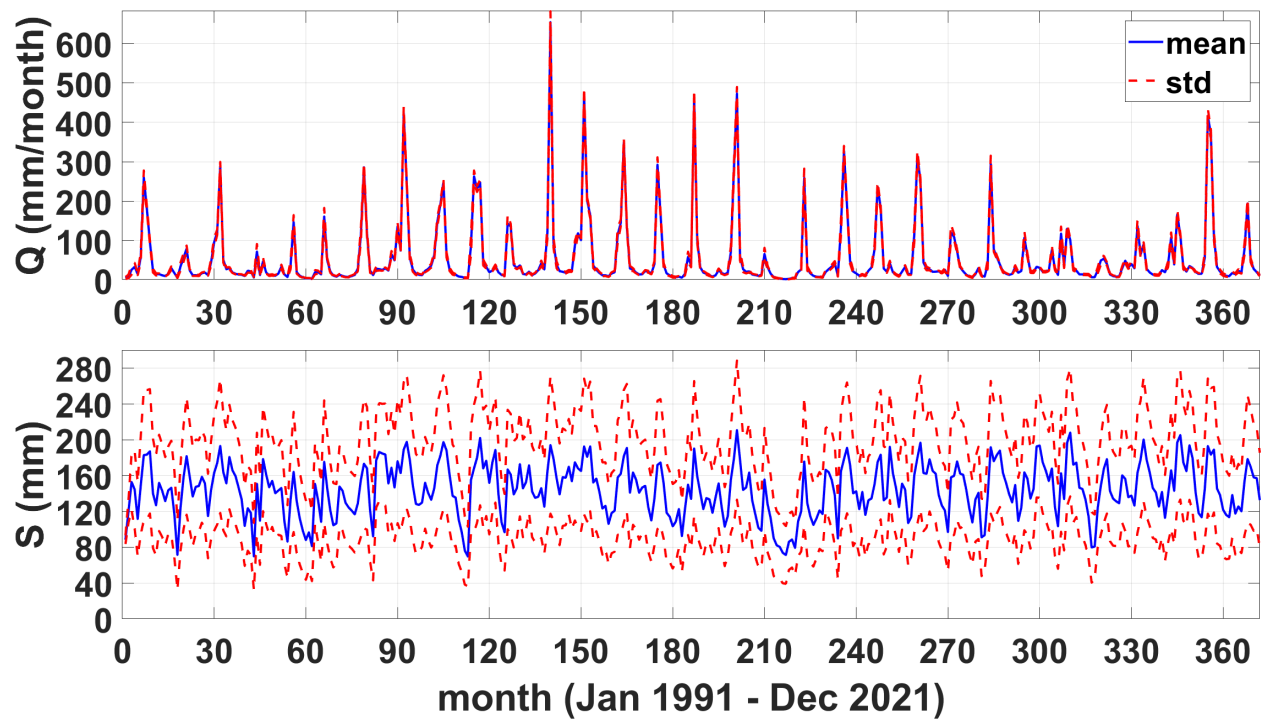

**Figure S4.** Simulated monthly runoff ensembles from posterior distribution of parameters (Hapcheon Dam Basin).

**Table S1.** Propagation probability of hydrological drought under various severities of meteorological drought at Andong Dam Basin (case 1).

| Seasons | Conditions<br>for SPI | Hydrological drought probability |                              |                              |                              |
|---------|-----------------------|----------------------------------|------------------------------|------------------------------|------------------------------|
|         |                       | SRI $\leq$ -0.5<br>(0.30854)     | SRI $\leq$ -1.0<br>(0.15866) | SRI $\leq$ -1.5<br>(0.06681) | SRI $\leq$ -2.0<br>(0.02275) |
| Spring  | SPI $\leq$ -0.5       | 0.60310                          | 0.36813                      | 0.17726                      | 0.06621                      |
|         | SPI $\leq$ -1.0       | 0.71591                          | 0.48298                      | 0.25800                      | 0.10593                      |
|         | SPI $\leq$ -1.5       | 0.81865                          | 0.61271                      | 0.36956                      | 0.17183                      |
|         | SPI $\leq$ -2.0       | 0.89799                          | 0.73871                      | 0.50458                      | 0.27002                      |
| Summer  | SPI $\leq$ -0.5       | 0.68387                          | 0.40204                      | 0.17966                      | 0.06260                      |
|         | SPI $\leq$ -1.0       | 0.78185                          | 0.51081                      | 0.24516                      | 0.08829                      |
|         | SPI $\leq$ -1.5       | 0.82974                          | 0.58220                      | 0.29863                      | 0.11164                      |
|         | SPI $\leq$ -2.0       | 0.84897                          | 0.61571                      | 0.32785                      | 0.12558                      |
| Fall    | SPI $\leq$ -0.5       | 0.57655                          | 0.33892                      | 0.15749                      | 0.05754                      |
|         | SPI $\leq$ -1.0       | 0.65909                          | 0.42224                      | 0.21320                      | 0.08350                      |
|         | SPI $\leq$ -1.5       | 0.72736                          | 0.50632                      | 0.28161                      | 0.12115                      |
|         | SPI $\leq$ -2.0       | 0.78035                          | 0.58233                      | 0.35577                      | 0.17004                      |
| Winter  | SPI $\leq$ -0.5       | 0.57810                          | 0.33998                      | 0.15800                      | 0.05772                      |
|         | SPI $\leq$ -1.0       | 0.66116                          | 0.42403                      | 0.21424                      | 0.08393                      |
|         | SPI $\leq$ -1.5       | 0.72971                          | 0.50878                      | 0.28336                      | 0.12201                      |
|         | SPI $\leq$ -2.0       | 0.78278                          | 0.58528                      | 0.35828                      | 0.17152                      |

**Table S2.** Propagation probability of hydrological drought under various severities of meteorological drought at Andong Dam Basin (case 2).

| Seasons | Conditions for SPI | Hydrological drought probability |                              |                              |                              |
|---------|--------------------|----------------------------------|------------------------------|------------------------------|------------------------------|
|         |                    | SRI $\leq$ -0.5<br>(0.30854)     | SRI $\leq$ -1.0<br>(0.15866) | SRI $\leq$ -1.5<br>(0.06681) | SRI $\leq$ -2.0<br>(0.02275) |
| Spring  | SPI $\leq$ -0.5    | 0.60263                          | 0.36781                      | 0.17711                      | 0.06617                      |
|         | SPI $\leq$ -1.0    | 0.71527                          | 0.48240                      | 0.25766                      | 0.10579                      |
|         | SPI $\leq$ -1.5    | 0.81796                          | 0.61189                      | 0.36892                      | 0.17150                      |
|         | SPI $\leq$ -2.0    | 0.89738                          | 0.73776                      | 0.50362                      | 0.26937                      |
| Summer  | SPI $\leq$ -0.5    | 0.72565                          | 0.42791                      | 0.19027                      | 0.06607                      |
|         | SPI $\leq$ -1.0    | 0.83215                          | 0.55929                      | 0.27094                      | 0.09770                      |
|         | SPI $\leq$ -1.5    | 0.87874                          | 0.64343                      | 0.33943                      | 0.12840                      |
|         | SPI $\leq$ -2.0    | 0.89609                          | 0.68132                      | 0.37706                      | 0.14738                      |
| Fall    | SPI $\leq$ -0.5    | 0.66407                          | 0.38949                      | 0.17430                      | 0.06081                      |
|         | SPI $\leq$ -1.0    | 0.75744                          | 0.48874                      | 0.23345                      | 0.08398                      |
|         | SPI $\leq$ -1.5    | 0.80499                          | 0.55440                      | 0.28095                      | 0.10448                      |
|         | SPI $\leq$ -2.0    | 0.82466                          | 0.58568                      | 0.30681                      | 0.11653                      |
| Winter  | SPI $\leq$ -0.5    | 0.57345                          | 0.33680                      | 0.15648                      | 0.05718                      |
|         | SPI $\leq$ -1.0    | 0.65497                          | 0.41870                      | 0.21115                      | 0.08266                      |
|         | SPI $\leq$ -1.5    | 0.72267                          | 0.50143                      | 0.27814                      | 0.11946                      |
|         | SPI $\leq$ -2.0    | 0.77549                          | 0.57646                      | 0.35080                      | 0.16712                      |

**Table S3.** Propagation probability of hydrological drought under various severities of meteorological drought at Andong Dam Basin (case 3).

| Seasons | Conditions<br>for SPI | Hydrological drought probability |                              |                              |                              |
|---------|-----------------------|----------------------------------|------------------------------|------------------------------|------------------------------|
|         |                       | SRI $\leq$ -0.5<br>(0.30854)     | SRI $\leq$ -1.0<br>(0.15866) | SRI $\leq$ -1.5<br>(0.06681) | SRI $\leq$ -2.0<br>(0.02275) |
| Spring  | SPI $\leq$ -0.5       | 0.63172                          | 0.36872                      | 0.16520                      | 0.05771                      |
|         | SPI $\leq$ -1.0       | 0.71705                          | 0.45375                      | 0.21498                      | 0.07716                      |
|         | SPI $\leq$ -1.5       | 0.76297                          | 0.51054                      | 0.25396                      | 0.09366                      |
|         | SPI $\leq$ -2.0       | 0.78272                          | 0.53809                      | 0.27503                      | 0.10315                      |
| Summer  | SPI $\leq$ -0.5       | 0.74750                          | 0.44098                      | 0.19536                      | 0.06769                      |
|         | SPI $\leq$ -1.0       | 0.85758                          | 0.58585                      | 0.28507                      | 0.10279                      |
|         | SPI $\leq$ -1.5       | 0.90223                          | 0.67699                      | 0.36306                      | 0.13825                      |
|         | SPI $\leq$ -2.0       | 0.91806                          | 0.71682                      | 0.40598                      | 0.16063                      |
| Fall    | SPI $\leq$ -0.5       | 0.64742                          | 0.37883                      | 0.16967                      | 0.05924                      |
|         | SPI $\leq$ -1.0       | 0.73672                          | 0.47057                      | 0.22385                      | 0.08044                      |
|         | SPI $\leq$ -1.5       | 0.78359                          | 0.53159                      | 0.26678                      | 0.09878                      |
|         | SPI $\leq$ -2.0       | 0.80339                          | 0.56096                      | 0.29008                      | 0.10945                      |
| Winter  | SPI $\leq$ -0.5       | 0.64173                          | 0.37517                      | 0.16806                      | 0.05869                      |
|         | SPI $\leq$ -1.0       | 0.72960                          | 0.46444                      | 0.22061                      | 0.07924                      |
|         | SPI $\leq$ -1.5       | 0.77616                          | 0.52391                      | 0.26207                      | 0.09690                      |
|         | SPI $\leq$ -2.0       | 0.79596                          | 0.55262                      | 0.28454                      | 0.10712                      |



**Table S4.** Propagation probability of hydrological drought under various severities of meteorological drought at Andong Dam Basin (case 4).

| Seasons | Conditions for SPI | Hydrological drought probability |                              |                              |                              |
|---------|--------------------|----------------------------------|------------------------------|------------------------------|------------------------------|
|         |                    | SRI $\leq$ -0.5<br>(0.30854)     | SRI $\leq$ -1.0<br>(0.15866) | SRI $\leq$ -1.5<br>(0.06681) | SRI $\leq$ -2.0<br>(0.02275) |
| Spring  | SPI $\leq$ -0.5    | 0.64342                          | 0.37626                      | 0.16854                      | 0.05885                      |
|         | SPI $\leq$ -1.0    | 0.73172                          | 0.46626                      | 0.22157                      | 0.07960                      |
|         | SPI $\leq$ -1.5    | 0.77837                          | 0.52619                      | 0.26347                      | 0.09745                      |
|         | SPI $\leq$ -2.0    | 0.79818                          | 0.55509                      | 0.28618                      | 0.10781                      |
| Summer  | SPI $\leq$ -0.5    | 0.75297                          | 0.44420                      | 0.19657                      | 0.06808                      |
|         | SPI $\leq$ -1.0    | 0.86383                          | 0.59265                      | 0.28869                      | 0.10408                      |
|         | SPI $\leq$ -1.5    | 0.90784                          | 0.68558                      | 0.36928                      | 0.14086                      |
|         | SPI $\leq$ -2.0    | 0.92324                          | 0.72584                      | 0.41363                      | 0.16420                      |
| Fall    | SPI $\leq$ -0.5    | 0.66488                          | 0.39001                      | 0.17453                      | 0.06088                      |
|         | SPI $\leq$ -1.0    | 0.75845                          | 0.48964                      | 0.23393                      | 0.08416                      |
|         | SPI $\leq$ -1.5    | 0.80603                          | 0.55553                      | 0.28166                      | 0.10476                      |
|         | SPI $\leq$ -2.0    | 0.82568                          | 0.58690                      | 0.30765                      | 0.11689                      |
| Winter  | SPI $\leq$ -0.5    | 0.60693                          | 0.35263                      | 0.15799                      | 0.05523                      |
|         | SPI $\leq$ -1.0    | 0.68575                          | 0.42774                      | 0.20133                      | 0.07210                      |
|         | SPI $\leq$ -1.5    | 0.72965                          | 0.47811                      | 0.23464                      | 0.08600                      |
|         | SPI $\leq$ -2.0    | 0.74901                          | 0.50281                      | 0.25255                      | 0.09388                      |

**Table S5.** Propagation probability of hydrological drought under various severities of meteorological drought at Andong Dam Basin (case 5).

| Seasons | Conditions<br>for SPI | Hydrological drought probability |                              |                              |                              |
|---------|-----------------------|----------------------------------|------------------------------|------------------------------|------------------------------|
|         |                       | SRI $\leq$ -0.5<br>(0.30854)     | SRI $\leq$ -1.0<br>(0.15866) | SRI $\leq$ -1.5<br>(0.06681) | SRI $\leq$ -2.0<br>(0.02275) |
| Spring  | SPI $\leq$ -0.5       | 0.65889                          | 0.38619                      | 0.17288                      | 0.06033                      |
|         | SPI $\leq$ -1.0       | 0.75102                          | 0.48306                      | 0.23044                      | 0.08287                      |
|         | SPI $\leq$ -1.5       | 0.79840                          | 0.54726                      | 0.27648                      | 0.10268                      |
|         | SPI $\leq$ -2.0       | 0.81813                          | 0.57795                      | 0.30152                      | 0.11428                      |
| Summer  | SPI $\leq$ -0.5       | 0.73368                          | 0.45295                      | 0.20878                      | 0.07323                      |
|         | SPI $\leq$ -1.0       | 0.88086                          | 0.64796                      | 0.35074                      | 0.13566                      |
|         | SPI $\leq$ -1.5       | 0.96421                          | 0.83294                      | 0.56059                      | 0.26473                      |
|         | SPI $\leq$ -2.0       | 0.99317                          | 0.94608                      | 0.77738                      | 0.47541                      |
| Fall    | SPI $\leq$ -0.5       | 0.67406                          | 0.39584                      | 0.17703                      | 0.06172                      |
|         | SPI $\leq$ -1.0       | 0.76979                          | 0.49981                      | 0.23932                      | 0.08614                      |
|         | SPI $\leq$ -1.5       | 0.81759                          | 0.56834                      | 0.28975                      | 0.10804                      |
|         | SPI $\leq$ -2.0       | 0.83707                          | 0.60075                      | 0.31726                      | 0.12101                      |
| Winter  | SPI $\leq$ -0.5       | 0.57994                          | 0.33499                      | 0.14995                      | 0.05243                      |
|         | SPI $\leq$ -1.0       | 0.65146                          | 0.40013                      | 0.18692                      | 0.06676                      |
|         | SPI $\leq$ -1.5       | 0.69253                          | 0.44391                      | 0.21481                      | 0.07822                      |
|         | SPI $\leq$ -2.0       | 0.71106                          | 0.46555                      | 0.22968                      | 0.08460                      |

**Table S6.** Propagation probability of hydrological drought under various severities of meteorological drought at Hapcheon Dam Basin (case 1).

| Seasons | Conditions for SPI | Hydrological drought probability |                              |                              |                              |
|---------|--------------------|----------------------------------|------------------------------|------------------------------|------------------------------|
|         |                    | SRI $\leq$ -0.5<br>(0.30854)     | SRI $\leq$ -1.0<br>(0.15866) | SRI $\leq$ -1.5<br>(0.06681) | SRI $\leq$ -2.0<br>(0.02275) |
| Spring  | SPI $\leq$ -0.5    | 0.66217                          | 0.42645                      | 0.20417                      | 0.07280                      |
|         | SPI $\leq$ -1.0    | 0.82932                          | 0.63534                      | 0.35799                      | 0.13814                      |
|         | SPI $\leq$ -1.5    | 0.94295                          | 0.85017                      | 0.62435                      | 0.29937                      |
|         | SPI $\leq$ -2.0    | 0.98735                          | 0.96335                      | 0.87912                      | 0.62098                      |
| Summer  | SPI $\leq$ -0.5    | 0.66999                          | 0.39326                      | 0.17593                      | 0.06135                      |
|         | SPI $\leq$ -1.0    | 0.76477                          | 0.49529                      | 0.23692                      | 0.08526                      |
|         | SPI $\leq$ -1.5    | 0.81249                          | 0.56264                      | 0.28614                      | 0.10658                      |
|         | SPI $\leq$ -2.0    | 0.83205                          | 0.59459                      | 0.31297                      | 0.11917                      |
| Fall    | SPI $\leq$ -0.5    | 0.73368                          | 0.43275                      | 0.19218                      | 0.06669                      |
|         | SPI $\leq$ -1.0    | 0.84158                          | 0.56894                      | 0.27607                      | 0.09955                      |
|         | SPI $\leq$ -1.5    | 0.88756                          | 0.65563                      | 0.34790                      | 0.13192                      |
|         | SPI $\leq$ -2.0    | 0.90440                          | 0.69426                      | 0.38740                      | 0.15208                      |
| Winter  | SPI $\leq$ -0.5    | 0.64944                          | 0.38013                      | 0.17024                      | 0.05943                      |
|         | SPI $\leq$ -1.0    | 0.73925                          | 0.47276                      | 0.22500                      | 0.08087                      |
|         | SPI $\leq$ -1.5    | 0.78622                          | 0.53434                      | 0.26847                      | 0.09946                      |
|         | SPI $\leq$ -2.0    | 0.80601                          | 0.56394                      | 0.29207                      | 0.11028                      |

**Table S7.** Propagation probability of hydrological drought under various severities of meteorological drought at Hapcheon Dam Basin (case 2).

| Seasons | Conditions<br>for SPI | Hydrological drought probability |                              |                              |                              |
|---------|-----------------------|----------------------------------|------------------------------|------------------------------|------------------------------|
|         |                       | SRI $\leq$ -0.5<br>(0.30854)     | SRI $\leq$ -1.0<br>(0.15866) | SRI $\leq$ -1.5<br>(0.06681) | SRI $\leq$ -2.0<br>(0.02275) |
| Spring  | SPI $\leq$ -0.5       | 0.69984                          | 0.44867                      | 0.20956                      | 0.07337                      |
|         | SPI $\leq$ -1.0       | 0.87253                          | 0.68199                      | 0.37788                      | 0.14089                      |
|         | SPI $\leq$ -1.5       | 0.96784                          | 0.89740                      | 0.67601                      | 0.31468                      |
|         | SPI $\leq$ -2.0       | 0.99498                          | 0.98251                      | 0.92409                      | 0.67461                      |
| Summer  | SPI $\leq$ -0.5       | 0.78131                          | 0.46033                      | 0.20244                      | 0.06988                      |
|         | SPI $\leq$ -1.0       | 0.89521                          | 0.62898                      | 0.30792                      | 0.11088                      |
|         | SPI $\leq$ -1.5       | 0.93491                          | 0.73126                      | 0.40367                      | 0.15539                      |
|         | SPI $\leq$ -2.0       | 0.94770                          | 0.77323                      | 0.45632                      | 0.18456                      |
| Fall    | SPI $\leq$ -0.5       | 0.71115                          | 0.41904                      | 0.18671                      | 0.06492                      |
|         | SPI $\leq$ -1.0       | 0.81491                          | 0.54214                      | 0.26181                      | 0.09438                      |
|         | SPI $\leq$ -1.5       | 0.86228                          | 0.62176                      | 0.32467                      | 0.12230                      |
|         | SPI $\leq$ -2.0       | 0.88045                          | 0.65820                      | 0.35916                      | 0.13934                      |
| Winter  | SPI $\leq$ -0.5       | 0.70851                          | 0.41741                      | 0.18604                      | 0.06470                      |
|         | SPI $\leq$ -1.0       | 0.81174                          | 0.53905                      | 0.26017                      | 0.09378                      |
|         | SPI $\leq$ -1.5       | 0.85921                          | 0.61786                      | 0.32205                      | 0.12123                      |
|         | SPI $\leq$ -2.0       | 0.87751                          | 0.65402                      | 0.35599                      | 0.13794                      |

**Table S8.** Propagation probability of hydrological drought under various severities of meteorological drought at Hapcheon Dam Basin (case 3).

| Seasons | Conditions for SPI | Hydrological drought probability |                              |                              |                              |
|---------|--------------------|----------------------------------|------------------------------|------------------------------|------------------------------|
|         |                    | SRI $\leq$ -0.5<br>(0.30854)     | SRI $\leq$ -1.0<br>(0.15866) | SRI $\leq$ -1.5<br>(0.06681) | SRI $\leq$ -2.0<br>(0.02275) |
| Spring  | SPI $\leq$ -0.5    | 0.61720                          | 0.39728                      | 0.19502                      | 0.07144                      |
|         | SPI $\leq$ -1.0    | 0.77260                          | 0.57747                      | 0.32951                      | 0.13257                      |
|         | SPI $\leq$ -1.5    | 0.90067                          | 0.78252                      | 0.55790                      | 0.27525                      |
|         | SPI $\leq$ -2.0    | 0.96884                          | 0.92450                      | 0.80830                      | 0.55015                      |
| Summer  | SPI $\leq$ -0.5    | 0.78730                          | 0.46362                      | 0.20357                      | 0.07022                      |
|         | SPI $\leq$ -1.0    | 0.90160                          | 0.63692                      | 0.31209                      | 0.11233                      |
|         | SPI $\leq$ -1.5    | 0.94016                          | 0.74117                      | 0.41146                      | 0.15872                      |
|         | SPI $\leq$ -2.0    | 0.95233                          | 0.78338                      | 0.46608                      | 0.18933                      |
| Fall    | SPI $\leq$ -0.5    | 0.66649                          | 0.39103                      | 0.17497                      | 0.06103                      |
|         | SPI $\leq$ -1.0    | 0.76044                          | 0.49141                      | 0.23486                      | 0.08450                      |
|         | SPI $\leq$ -1.5    | 0.80806                          | 0.55776                      | 0.28306                      | 0.10533                      |
|         | SPI $\leq$ -2.0    | 0.82769                          | 0.58931                      | 0.30931                      | 0.11760                      |
| Winter  | SPI $\leq$ -0.5    | 0.71273                          | 0.45572                      | 0.21097                      | 0.07348                      |
|         | SPI $\leq$ -1.0    | 0.88624                          | 0.69753                      | 0.38380                      | 0.14151                      |
|         | SPI $\leq$ -1.5    | 0.97432                          | 0.91145                      | 0.69283                      | 0.31894                      |
|         | SPI $\leq$ -2.0    | 0.99650                          | 0.98689                      | 0.93659                      | 0.69184                      |

**Table S9.** Propagation probability of hydrological drought under various severities of meteorological drought at Hapcheon Dam Basin (case 4).

| Seasons | Conditions<br>for SPI | Hydrological drought probability |                              |                              |                              |
|---------|-----------------------|----------------------------------|------------------------------|------------------------------|------------------------------|
|         |                       | SRI $\leq$ -0.5<br>(0.30854)     | SRI $\leq$ -1.0<br>(0.15866) | SRI $\leq$ -1.5<br>(0.06681) | SRI $\leq$ -2.0<br>(0.02275) |
| Spring  | SPI $\leq$ -0.5       | 0.54554                          | 0.31763                      | 0.14718                      | 0.05384                      |
|         | SPI $\leq$ -1.0       | 0.61770                          | 0.38723                      | 0.19290                      | 0.07514                      |
|         | SPI $\leq$ -1.5       | 0.67971                          | 0.45811                      | 0.24797                      | 0.10479                      |
|         | SPI $\leq$ -2.0       | 0.73015                          | 0.52399                      | 0.30773                      | 0.14233                      |
| Summer  | SPI $\leq$ -0.5       | 0.79309                          | 0.46674                      | 0.20463                      | 0.07054                      |
|         | SPI $\leq$ -1.0       | 0.90767                          | 0.64467                      | 0.31616                      | 0.11374                      |
|         | SPI $\leq$ -1.5       | 0.94505                          | 0.75083                      | 0.41919                      | 0.16202                      |
|         | SPI $\leq$ -2.0       | 0.95662                          | 0.79320                      | 0.47577                      | 0.19412                      |
| Fall    | SPI $\leq$ -0.5       | 0.65878                          | 0.38612                      | 0.17285                      | 0.06032                      |
|         | SPI $\leq$ -1.0       | 0.75088                          | 0.48294                      | 0.23038                      | 0.08285                      |
|         | SPI $\leq$ -1.5       | 0.79826                          | 0.54711                      | 0.27639                      | 0.10264                      |
|         | SPI $\leq$ -2.0       | 0.81799                          | 0.57778                      | 0.30141                      | 0.11424                      |
| Winter  | SPI $\leq$ -0.5       | 0.70746                          | 0.45287                      | 0.21042                      | 0.07344                      |
|         | SPI $\leq$ -1.0       | 0.88070                          | 0.69120                      | 0.38143                      | 0.14127                      |
|         | SPI $\leq$ -1.5       | 0.97179                          | 0.90584                      | 0.68600                      | 0.31726                      |
|         | SPI $\leq$ -2.0       | 0.99593                          | 0.98521                      | 0.93165                      | 0.68486                      |

**Table S10.** Propagation probability of hydrological drought under various severities of meteorological drought at Hapcheon Dam Basin (case 5).

| Seasons | Conditions<br>for SPI | Hydrological drought probability |                              |                              |                              |
|---------|-----------------------|----------------------------------|------------------------------|------------------------------|------------------------------|
|         |                       | SRI $\leq$ -0.5<br>(0.30854)     | SRI $\leq$ -1.0<br>(0.15866) | SRI $\leq$ -1.5<br>(0.06681) | SRI $\leq$ -2.0<br>(0.02275) |
| Spring  | SPI $\leq$ -0.5       | 0.65524                          | 0.38385                      | 0.17186                      | 0.05998                      |
|         | SPI $\leq$ -1.0       | 0.74648                          | 0.47907                      | 0.22833                      | 0.08210                      |
|         | SPI $\leq$ -1.5       | 0.79372                          | 0.54225                      | 0.27336                      | 0.10142                      |
|         | SPI $\leq$ -2.0       | 0.81347                          | 0.57252                      | 0.29784                      | 0.11272                      |
| Summer  | SPI $\leq$ -0.5       | 0.79446                          | 0.46747                      | 0.20488                      | 0.07061                      |
|         | SPI $\leq$ -1.0       | 0.90909                          | 0.64652                      | 0.31713                      | 0.11407                      |
|         | SPI $\leq$ -1.5       | 0.94619                          | 0.75314                      | 0.42105                      | 0.16281                      |
|         | SPI $\leq$ -2.0       | 0.95761                          | 0.79554                      | 0.47812                      | 0.19529                      |
| Fall    | SPI $\leq$ -0.5       | 0.65202                          | 0.38179                      | 0.17096                      | 0.05968                      |
|         | SPI $\leq$ -1.0       | 0.74246                          | 0.47556                      | 0.22648                      | 0.08141                      |
|         | SPI $\leq$ -1.5       | 0.78955                          | 0.53785                      | 0.27064                      | 0.10033                      |
|         | SPI $\leq$ -2.0       | 0.80934                          | 0.56774                      | 0.29462                      | 0.11136                      |
| Winter  | SPI $\leq$ -0.5       | 0.70025                          | 0.44890                      | 0.20961                      | 0.07337                      |
|         | SPI $\leq$ -1.0       | 0.87297                          | 0.68249                      | 0.37808                      | 0.14091                      |
|         | SPI $\leq$ -1.5       | 0.96806                          | 0.89787                      | 0.67655                      | 0.31483                      |
|         | SPI $\leq$ -2.0       | 0.99503                          | 0.98266                      | 0.92451                      | 0.67516                      |
